# Supplementary material for: A diet containing cod backbone proteins attenuated the development of mesangial sclerosis and tubular dysfunction in male obese BTBR ob/ob mice
Source: Springer Nature journal article supplement (doi:10.1007/s00394-023-03227-4), 2023-08-07

Glomerular area [ $\mu\text{m}^2$ ]

15000  
10000  
5000

Obese ctrl    Obese Cod-BB    Lean ctrl    Lean Cod-BB

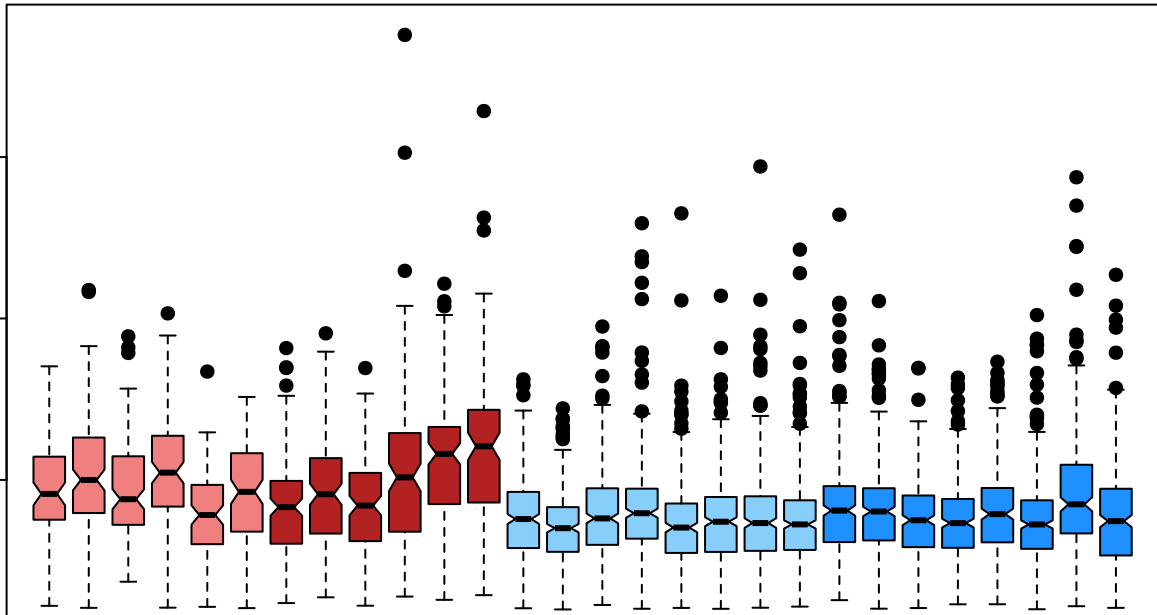

Supplement: MOESM1 [file 25895288]
